14. Miller PB: Myotonic dystrophy with electrocardiographic abnormalities. Report of a case. *Am Heart J* 63:704-707, 1963
15. Payne CA: Electrocardiographic abnormalities associated with myotonic dystrophy. *Am Heart J* 65:436-440, 1963
16. Church SC: The heart in myotonia atrophica. *Arch Intern Med* 119:176-181, 1967
17. Flora GC: Differential diagnosis of myotonia. *Postgrad Med* 41:152-154, 1967
18. Miller RD, Eger EI II, Way WL, et al: Comparative neuromuscular effects of Forane and halothane alone and in combination with *d*-tubocurarine in man. *ANESTHESIOLOGY* 35:38-42, 1971
19. Savarese JJ, Ali HH, Antonio RP: The clinical pharmacology of metocurine: Dimethyltubocurarine revisited. *ANESTHESIOLOGY* 47:277-284, 1977
20. Gillam PM, Heaf PJ, Kaufman L, et al: Respiration in dystrophia myotonica. *Thorax* 19:112-120, 1964
21. Bourke TD, Zuck D: Thiopentone in dystrophia myotonica. *Br J Anaesth* 29:35-38, 1957
22. McClelland, RM: The myasthenic state and the myotonic syndrome. *Br J Anaesth* 32:81-88, 1960

Anesthesiology  
49:48-50, 1978

## The Shape of the Human Adult Trachea

COLIN F. MACKENZIE, M.B., F.F.A.R.C.S.,\* T. CRAWFORD McASLAN, M.D.,† BAEKHYO SHIN, M.D.,\*  
DIETER SCHELLINGER, M.D.,‡ MARTIN HELRICH, M.D.§

The adult trachea has been described as triangular,<sup>1</sup> elliptical,<sup>2</sup> C-shaped,<sup>3</sup> and non-circumferential<sup>4</sup> in cross-section. Tracheal shape has been suggested as a possible reason for trauma occurring as a result of intubation in reference to Morquio's disease, where malformation of the tracheal cartilage is found.<sup>5</sup> The adult trachea is not circular,<sup>6</sup> but the cuff of a freely inflated endotracheal tube is circular in cross-section. To seal the airway this cuff must either conform to or deform the trachea.<sup>4</sup> A high-compliance cuff should conform, but damage to the trachea has been reported.<sup>7</sup> There appears to be no single etiologic factor in the development of tracheal damage, although many predisposing factors have been reported.<sup>8-10</sup> The cross-sectional shape of the trachea would seem to be another important determinant of damage. For this reason, cross-sectional tracheal shapes were studied.

### METHOD

One hundred eleven adult tracheas were dissected at autopsy and specimens obtained. Cross sections

\* Assistant Professor, Department of Anesthesiology, University of Maryland.

† Professor, Department of Anesthesiology, University of Maryland.

‡ Associate Professor, Department of Radiology, Georgetown University.

§ Professor and Chairman, Department of Anesthesiology, University of Maryland.

Received from the Department of Anesthesiology, University of Maryland Hospital and Medical School, Baltimore, Maryland, and Georgetown University Hospital, Washington, D. C. Accepted for publication December 22, 1977.

Address reprint requests to Dr. Mackenzie, Department of Anesthesiology, University of Maryland Hospital, Redwood and Greene Sts., Baltimore, Maryland 21201.

were taken between the fourth and seventh tracheal rings at the point where the cuff of a tracheostomy or orotracheal tube would be expected to be positioned. To prevent gravitational shape changes the specimens were stored in individual 50-ml containers and were preserved in formalin.

The age, weight, height, sex, and race of every patient were recorded. All specimens examined were from non-intubated patients admitted to the Medical Examiners Office in Baltimore, Maryland. There was no pathologic abnormality in or around any of the tracheas that would have caused any distortion of tracheal shape.

To classify tracheal shape the ratio of the transverse diameter to the anteroposterior (AP) diameter and the angle between the posterior membranous portion and the cartilage of the tracheal ring were recorded. Two observers made independent classifications of the specimens. These were repeated four weeks later without reference to the first findings.

Computerized axial tomography (CAT) of the neck at the level of the sternoclavicular joint was used to show the cross-sectional shape of the trachea *in vivo*.

### RESULTS

Six distinct tracheal shapes were seen (fig. 1). The most common (48.6 per cent) was the C shape (table 1). This type was circular except for the posterior membranous portion. The cartilaginous portion made an obtuse angle with the membrane, and anteroposterior and transverse diameters were equal. The next most frequent was the U shape (27 per cent). This had a larger anteroposterior than transverse diameter, and the cartilage made an obtuse or right angle with the membranous portion. Two other

shapes were also seen frequently. These were the D shape (12.6 per cent) and the elliptical (8.2 per cent). The D-shaped trachea had a large membranous portion, the transverse diameter was larger than the anteroposterior diameter, and the cartilage made an acute angle with the membranous portion. The elliptical trachea had a larger transverse than anteroposterior diameter, and the cartilage made an obtuse angle with the membrane.

Rarely, tracheal shapes were circular (1.8 per cent) or triangular (1.8 per cent). The circular trachea was an almost complete ring of cartilage, with a small, practically nonexistent membranous portion. The triangular trachea had approximately equal anteroposterior and transverse diameters, and the cartilage made an acute angle with the membrane.

Of the 111 specimens, 103 were similarly classified by independent observers. Differences in classification were due to the problem of differentiating U, C and elliptical shapes when the anteroposterior and transverse diameters were nearly equal. These eight transitional specimens were classified by mutual agreement between observers.

There was no correlation between patient age, weight, height, sex, or race and any of the tracheal shapes studied. Mean age was 42.3 years (range 16–69), mean weight 70.9 kg (37.7–138.6) and mean height 170 cm (147–196). Eighty-two patients were male. Sixty-four patients were white, 45 black, and two oriental.

CAT scans at the level of the sternoclavicular joint in 31 patients confirmed the presence of all the above shapes *in vivo*. The distribution of shapes is shown in table 1. There was no difference between frequencies of CAT scan and anatomic shapes ( $\chi^2$  test,  $P > 0.05$ ).

#### DISCUSSION

The specimens showed considerable variation in tracheal cross-sectional shape. The same shapes were confirmed in non-intubated patients by CAT scan.

TABLE 1. Incidences of Anatomic and CAT Scan Cross-sectional Tracheal Shapes

|                 | Tracheal Shape |    |      |            |          |            |
|-----------------|----------------|----|------|------------|----------|------------|
|                 | C              | U  | D    | Elliptical | Circular | Triangular |
| Anatomic Number | 54             | 30 | 14   | 9          | 2        | 2          |
| Per cent        | 48.6           | 27 | 12.6 | 8.2        | 1.8      | 1.8        |
| CAT scan Number | 13             | 9  | 4    | 3          | 1        | 1          |
| Per cent        | 42             | 29 | 12.9 | 9.7        | 3.2      | 3.2        |

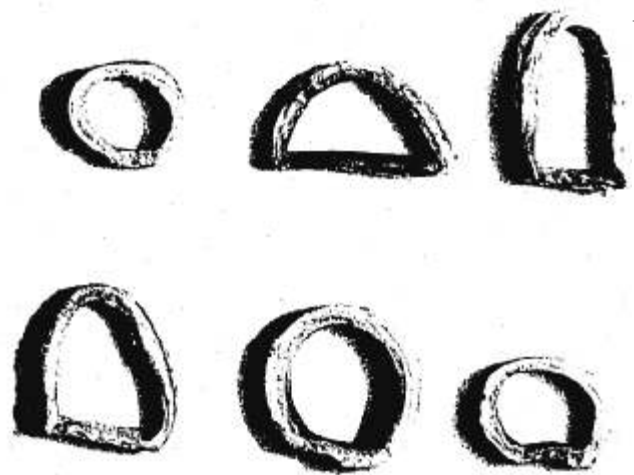

FIG. 1. Examples of tracheal cross-sectional shapes at autopsy (left to right) Top row: circular; D; U. Bottom row: triangular; C; elliptical.

There is no evidence that these shapes are influenced by postmortem changes or formalin-induced shrinkage. However, during ventilation and coughing tracheal shape is known to change. The compliance of the trachea decreases with age, and its length and volume increase with positive pressure in the airway.<sup>11</sup> Shape may also be influenced by the effect of the supporting tissues around the trachea.

It is important to differentiate between tracheas that have larger anteroposterior than transverse diameters and those that have larger transverse diameters. U-shaped tracheas fall into the former group, D-shaped and elliptical tracheas into the latter.

If anteroposterior and lateral diameters could be identified prior to endotracheal intubation, an anatomically designed cuff might reduce the damage inflicted during prolonged intubation. We are presently studying anteroposterior and lateral air tracheograms as a noninvasive technique of tracheal measurement. Although CAT scanning is the ideal method of identification of tracheal shape, it is not presently practical in most situations.

The authors are grateful to Russell S. Fisher, M.D., Chief Medical Examiner, and the Staff of the Medical Examiners Office, Baltimore, Maryland, for their help and cooperation.

#### REFERENCES

1. Dobrin P, Canfield T: Cuffed endotracheal tubes: Mucosal pressures and tracheal wall blood flow. *Am J Surg* 133: 562–568, 1977
2. Lindholm CE: Prolonged endotracheal intubation. *Acta Anaesthesiol Scand suppl* 33, 1969
3. Applebaum EL, Bruce DL: *Tracheal Intubation*. Philadelphia, W. B. Saunders, 1976, p 18

4. Cooper JD, Grillo HC: Experimental production and prevention of injury due to cuffed tracheal tubes. *Surg Gynecol Obstet* 129:1235-1241, 1969
5. Blanc VF, Tremblay NAG: The complications of tracheal intubation: A new classification with a review of the literature. *Anesth Analg (Cleve)* 53:202-214, 1974
6. Gray's Anatomy. 29th American edition. Edited by Goss CM Philadelphia, Lea and Febiger, 1973, p 1131
7. Bradbeer TL, James ML, Sear JW, et al: Tracheal stenosis associated with a low pressure cuffed endotracheal tube. *Anaesthesia* 31:504-507, 1976
8. Adriani J, Phillips M: Use of endotracheal cuffs: Some data pro and con. *ANESTHESIOLOGY* 18:1-14, 1957
9. Cooper JD, Grillo MC: Evolution of tracheal injury due to ventilatory assistance through cuffed tubes—a pathological study. *Ann Surg* 169:334-338, 1969
10. Mackenzie CF, Klose S, Browne DRG: A study of inflatable cuffs on endotracheal tubes—pressures exerted on the trachea. *Br J Anaesth* 48:105-110, 1976
11. Croteau JR, Cook CD: Volume—pressure and length—tension measurements in human tracheal and bronchial segments. *J Appl Physiol* 16:170-172, 1961

Anesthesiology  
49:50-52, 1978

## Spontaneous Dislocation of Endotracheal Tubes

IGNACIO RIPOLL, M.D.,\* CARL-ERIC LINDHOLM, M.D.,† ROBERT CARROLL, M.D.,‡ AKE GRENVIK, M.D.§

The concern about laryngeal and tracheal injury from prolonged endotracheal intubation has led to development of softer tubes with large-diameter/low-pressure cuffs. While these innovations have decreased the incidence of pressure necrosis of the tracheal mucosa, they have also created new problems. For instance, nasogastric tubes and other esophageal devices may accidentally enter the trachea, unimpeded by the soft cuff of the tracheal tube.<sup>1</sup>

During 1975, in 18 ICU patients, we tested an experimental polyvinylchloride (PVC) tube, softer than those commercially available. Six of the 18 patients managed to "extubate" the trachea without using their hands, and despite firm fixation of the tubes to the face. On inspection, the six tubes were all found to be either looped in the mouth and pharynx or tortuously deformed. At that time, the mechanisms of tracheal tube dislocation were believed to include chewing, coughing, bucking, "tongueing," and moving the head. Because of the problem, the manufacturer was advised not to produce this soft PVC tube or to modify it to avoid this dangerous complication. More recently, however, patients in our intensive care unit have had similar spontaneous dislocations of commercially available PVC tubes. Two

of these cases are reported here, and the likely causes of dislocation discussed, based on observations during experimental ventilation of a lung model and of cadavers.

### REPORT OF TWO CASES

*Case 1.* A 56-year-old white man was hospitalized for elective total colectomy because of uncontrolled ulcerative colitis, unresponsive to medical therapy. Colectomy was uncomplicated, but during the first two postoperative days, severe respiratory distress developed. Roentgenograms of the chest revealed dense pulmonary infiltrates. At bronchoscopy, a large quantity of purulent material was removed. It grew *Pseudomonas aeruginosa*. The patient's condition deteriorated, and he was admitted to the intensive care unit for mechanical ventilation. A PVC tracheal tube, 8.5 mm I.D. was inserted orally under direct vision without difficulty. The cuff was seen to pass well below the vocal cords. Roentgenograms of the chest showed the tube in good position. The tube was secured to the face using tincture of benzoin and adhesive tape. Three hours later, an air leak developed. The tube was still firmly fixed to the face but distorted in the mouth, the cuff completely above the cords. This tube was removed, a second tube placed, and the cuff was again seen to pass below the cords. Exit of air from the tube was ascertained by pushing on the chest. The cuff was inflated with air until it just sealed. Breath sounds were heard by two examiners to be equal on both sides. Once more, the tube was routinely secured to the face as described above. Over the next 15 minutes, the patient's condition was stable. However, after a routine post-intubation roentgenogram of the chest, he became agitated, bradycardic, and then asystolic. When manual assistance of ventilation through the orotracheal tube was begun, a large air leak was immediately apparent, necessitating extubation and insertion of a third tube of the same type. The roentgenogram obtained immediately prior to cardiac arrest showed the orotracheal tube to be completely dislodged from the trachea, and its tip in the esophagus. Following cardiopulmonary resuscitation, until death 12 hours later, the patient remained totally unresponsive. A post-cardiopulmonary resuscitation portable chest x-ray film showed the tip of the third endotracheal tube 4 cm above the carina. Ventilation with a tidal volume of 1,000 ml and a positive end-expiratory pressure (PEEP) of 5 cm H<sub>2</sub>O caused peak airway pressure to oscillate between 30 and 35 cm H<sub>2</sub>O. Another roentgenographic examination 8 hours after cardiopulmonary

\* Formerly Critical Care Medicine Fellow, University of Pittsburgh.

† Associate Professor, University of Uppsala.

‡ Assistant Professor, University of Pittsburgh.

§ Professor, University of Pittsburgh.

Received from the Department of Anesthesiology/Critical Care Medicine, University Health Center Hospitals, Pittsburgh, Pennsylvania, and the Department of Oto-Rhino-Laryngology, University Hospital, Uppsala, Sweden. Accepted for publication December 22, 1977.

Address reprint requests to Dr. Grenvik: Department of Anesthesiology, University of Pittsburgh School of Medicine, 1060-C Scaife Hall, Pittsburgh, Pennsylvania 15261.
